# Supplementary material for: Intronic gRNAs for the Construction of Minimal Gene Drive Systems
Source: Front Bioeng Biotechnol. 2022 May 12;10:857460. doi: 10.3389/fbioe.2022.857460 (PMC9133698; doi:10.3389/fbioe.2022.857460)
Supplement: Supplementary file 3 [file Table1.XLSX]

## Sheet: AmpliconSeq
reference	TCCAAGCTACTAGATCTTTGCAAGCTAACGCGAAAAAAAACCAGCTTTGCGATGAGTGCGGAACCAAGTCCGGTAATGAGTCCCCAGCAGCAGGCCGAGCGGGAGAAGGTGTACCAGTTGATC
ID	Modifications	reads	% reads	Prevalence	Comments
1	TCCAAGCTACTAGATCTTTGCAAGCTAACGCGAAAAAAAACCAGCTTTGCG------------------------ATGAGTCCCCAGCAGCAGGCCGAGCGGGAGAAGGTGTACCAGTTGATC	5792	11.5232	7	24 bp/8 codon deletion, ATGAGT microhomology - loss of ATG
2	TCCAAGCTACTAGATCTTTGCAAGCTAACGCGAAAAAAAACCAGCTTTGCGATGAGTGCGGAACCAA^TCA^GTCCGGTAATGAGTCCCCAGCAGCAGGCCGAGCGGGAGAAGGTGTACCAGTTGATC	2510	5.45184	5	3 bp/1 codon insertion
3	TCCAAGCTACTAGATCTTTGCAAGCTAACGCGAAAAAAAACCAGCTTTGCGATGAGTGCGGA------------AATGAGTCCCCAGCAGCAGGCCGAGCGGGAGAAGGTGTACCAGTTGATC	1392	2.79902	5	18 bp/6 codon deletion
4	TCCAAGCTACTAGATCTTTGCAAGCTAACGCGAAAAAAAACCAGCTTTGCGATGAGTGCGGAA----GTCCGGTAATGAGTCCCCAGCAGCAGGCCGAGCGGGAGAAGGTGTACCAGTTGATC	1246	2.4876	3	4 bp deletion
5	TCCAAGCTACTAGATCTTTGCAAGCTAACGCGAAAAAAAACCAGCTTTGCGATGAGTGCGG------------------------AGCAGCAGGCCGAGCGGGAGAAGGTGTACCAGTTGATC	1174	2.46206	7	24 bp/8 codon deletion
6	TCCAAGCTACTAGATCTTTGCAAGCTAACGCGAAAAAAAACCAGCTTTGCGATGAGTGCGGAACC^ACCGCA^CCGGTAATGAGTCCCCAGCAGCAGGCCGAGCGGGAGAAGGTGTACCAGTTGATC	910	1.86475	1	2 bp insertion/substitution
7	TCCAAGCTACTAGATCTTTGCAAGCTAACG----------------------------------------CGGTAATGAGTCCCCAGCAGCAGGCCGAGCGGGAGAAGGTGTACCAGTTGATC	970	1.79477	1	40 bp deletion, start codon lost
8	TCCAAGCTACTAGATCTTTGCAAGCTAACGCGAAAAAAAACCAGCTTTGCGATGAGTGCGGAACC---TCCGGTAATGAGTCCCCAGCAGCAGGCCGAGCGGGAGAAGGTGTACCAGTTGATC	693	1.48598	1	3 bp/1 codon deletion
9	TCCAAGCTACTAGATCTTTGCAAGCTAACGCGAAAAAAAACCAGCTTTGCGATGAGTGCGGAACCA^TG^AGTCCGGTAATGAGTCCCCAGCAGCAGGCCGAGCGGGAGAAGGTGTACCAGTTGATC	763	1.37997	2	2 bp insertion
10	TCCAAGCTACTAGATCTTTGCAAGCTAACGCGAAAAAAAA------------------------------------------CCCAGCAGCAGGCCGAGCGGGAGAAGGTGTACCAGTTGATC	740	1.36931	2	42 bp deletion, start codon lost
11	TCCAAGCTACTAGATCTTTGCAAGCTAACGCGAAAAAAAACCAGCTTTGCGATGAGTGCGGA-----------TAATGAGTCCCCAGCAGCAGGCCGAGCGGGAGAAGGTGTACCAGTTGATC	490	1.05069	1	11 bp deletion
12	TCCAAGCTACTAGATCTTTGCAAGCTAACGCGAAAAAAAACCAGCTTTGC-----------------------TAATGAGTCCCCAGCAGCAGGCCGAGCGGGAGAAGGTGTACCAGTTGATC	527	0.975095	1	23 bp deletion, start codon lost
13	TCCAAGCTACTAGATCTTTGCAAGCTAACGCGAAAAAAAACCAGCTTTG---------------------CGGTAATGAGTCCCCAGCAGCAGGCCGAGCGGGAGAAGGTGTACCAGTTGATC	497	0.919778	2	21 bp deletion, start codon lost
14	TCCAAGCTACTAGATCTTTGCAAGCTAACGCGAAAAAAAACCAGCTTTGCGATGAGTGC---------TCCGGTAATGAGTCCCCAGCAGCAGGCCGAGCGGGAGAAGGTGTACCAGTTGATC	391	0.900092	1	9 bp/3 codon deletion
15	TCCAAGCTACTAGATCTTTGCAAGCTAACGCGAAAAAAAACCAGCTTTGCGATGAGTGCGGA----------GTAATGAGTCCCCAGCAGCAGGCCGAGCGGGAGAAGGTGTACCAGTTGATC	446	0.825223	1	10 bp deletion
					disruptive mutation
					putative tolerable mutation
					ambiguous/unclear

## Sheet: SangerSeq
		reference	AAGCTAACGCGAAAAAAAAACCAGCTTTGCGATGAGTGCGGAACCAAGTCCGGTAATGAGTCCCCAGCAGCAGGCCGAGCGG
Release condition %	Replica	ID	Modifications
25	1	A1-A8	AAGCTAACGCGAAAAAAAAACCAGCTTTGCGATGAGTGCGGAACC------GGTAATGAGTCCCCAGCAGCAGGCCGAGCGG
25	1	A1-A10	AAGCTAACGCGAAAAAAAAACCAGCTTTGCGATGAGTGCGGAACC------GGTAATGAGTCCCCAGCAGCAGGCCGAGCGG
25	1	A1-A9	AAGCTAACGCGAAAAAAAAACCAGCTTTGCGATGAG------------TCCGGTAATGAGTCCCCAGCAGCAGGCCGAGCGG
25	1	A1-D1	AAGCTAACGCGAAAAAAAAACCAGCTTTGCGATGAGTGCGGAACC------GGTAATGAGTCCCCAGCAGCAGGCCGAGCGG
25	1	A1-D4	AAGCTAACGCGAAAAAAAAACCAGCTTTGCGATGAG------------TCCGGTAATGAGTCCCCAGCAGCAGGCCGAGCGG
25	2	A2-F3	AAGCTAACGCGAAAAAAAAACCAGCTTTGCGATGAGTGCGGAACCA-GTCCGGTAATGAGTCCCCAGCAGCAGGCCGAGCGG
25	2	A2-F12	AAGCTAACGCGAAAAAAAAACCAGCTTTGCGATGAGTGCGGAACC------GGTAATGAGTCCCCAGCAGCAGGCCGAGCGG
25	2	A2-G7	AAGCTAACGCGAAAAAAAAACCAGCTTTGCGATGAGTGCGGAAC^TGTCCG^CA^C^TGTCCGGTAATGAGTCCCCAGCAGCAGGCCGAGCGG
25	2	A2-G12	AAGCTAACGCGAAAAAAAAACCAGCTTTGCGATGAGTGCGGAACCA-GTCCGGTAATGAGTCCCCAGCAGCAGGCCGAGCGG
25	2	A2-H5	AAGCTAACGCGAAAAAAAAACCAGCTTTGCGATGAGTGCGGAACCA-GTCCGGTAATGAGTCCCCAGCAGCAGGCCGAGCGG
25	3	A3-A1	AAGCTAACGCGAAAAAAAAACCAGCTTTGCGATGAGTGCGGAACCAC-TCCGGTAATGAGTCCCCAGCAGCAGGCCGAGCGG
25	3	A3-A9	AAGCTAACGCGAAAAAAAAACCAGCTTTGCGATGAGTGCG-----------------GAGTCCCCAGCAGCAGGCCGAGCGG
25	3	A3-B5	AAGCTAACGCGAAAAAAAAACCAGCTTTGCGATGAGTGCG-----------------GAGTCCCCAGCAGCAGGCCGAGCGG
25	3	A3-C2	AAGCTAACGCGAAAAAAAAAC-----------------------------CGGTAATGAGTCCCCAGCAGCAGGCCGAGCGG
25	3	A3-D3	AAGCTAACGCGAAAAAAAAACCAGCTTTGCGATGAGTGCGGAACCAC-TCCGGTAATGAGTCCCCAGCAGCAGGCCGAGCGG
25	4	A4-D11	AAGCTAACGCGAAAAAAAAACCAGCTTTGCGATGAGT------------CCGGTAATGAGTCCCCAGCAGCAGGCCGAGCGG
25	4	A4-E2	AAGCTAACGCGAAAAAAAAACCAGCTTTGCGATGAGTGCT------------GTAATGAGTCCCCAGCAGCAGGCCGAGCGG
25	4	A4-E9	AAGCTAACGCGAAAAAAAAACCAGCTTTGCGATGAGTGCT------------GTAATGAGTCCCCAGCAGCAGGCCGAGCGG
25	4	A4-G2	AAGCTAACGCGAAAAAAAAACCAGCTTTGCGATGAGT------------CCGGTAATGAGTCCCCAGCAGCAGGCCGAGCGG
25	4	A4-H7	AAGCTAACGCGAAAAAAAAACCAGCTTTGCGATGAGTGCT------------GTAATGAGTCCCCAGCAGCAGGCCGAGCGG
15	1	B1-A5	AAGCTAACGCGAAAAAAAAACCAGCTTTGCGATGAGTGCGGAACC------GGTAATGAGTCCCCAGCAGCAGGCCGAGCGG
15	1	B1-A9	AAGCTAACGCGAAAAAAAAACCAGCTTTGCGATGAG------------TCCGGTAATGAGTCCCCAGCAGCAGGCCGAGCGG
15	1	B1-B10	AAGCTAACGCGAAAAAAAAACCAGCTTTGCGATGAG------------TCCGGTAATGAGTCCCCAGCAGCAGGCCGAGCGG
15	1	B1-D7	AAGCTAACGCGAAAAAAAAACCAGCTTTGCGATGAGTGCGGAACCA^CGATG^AGTCCGGTAATGAGTCCCCAGCAGCAGGCCGAGCGG
15	1	B1-D9	AAGCTAACGCGAAAAAAAAACCAGCTTTGCGATGAGTGCGGAACC------GGTAATGAGTCCCCAGCAGCAGGCCGAGCGG
15	2	B2-E11	AAGCTAACGCGAAAAAAAAACCAGCTTTGCGATGAGTGCGGAACC------GGTAATGAGTCCCCAGCAGCAGGCCGAGCGG
15	2	B2-F6	AAGCTAACGCGAAAAAAAAACCAGCTTTGCGATGAGTGCGGAACC------GGTAATGAGTCCCCAGCAGCAGGCCGAGCGG
15	2	B2-F10	AAGCTAACGCGAAAAAAAAACCAGCTTTGCGATGAGTGCGGAACC------GGTAATGAGTCCCCAGCAGCAGGCCGAGCGG
15	2	B2-G2	AAGCTAACGCGAAAAAAAAACCAGCTTTGCGATGAGTGCGGAACCA--------AACCAGTCCCCAGCAGCAGGCCGAGCGG
15	2	B2-H4	AAGCTAACGCGAAAAAAAAACCAGCTTTGCGATGAGTGCGGAACC------GGTAATGAGTCCCCAGCAGCAGGCCGAGCGG
15	3	B3-A6	AAGCTAACGCGAAAAAAAAACCAGCTTTGCGATGAGTGCGGAACC------GGTAATGAGTCCCCAGCAGCAGGCCGAGCGG
15	3	B3-A8	AAGCTAACGCGAAAAAAAAAGC--------------------------TCCGGTAATGAGTCCCCAGCAGCAGGCCGAGCGG
15	3	B3-A11	AAGCTAACGCGAAAAAAAAACCAGCTTTGCGATGAGTGCGGAACCA-GTCCGGTAATGAGTCCCCAGCAGCAGGCCGAGCGG
15	3	B3-A12	AAGCTAACGCGAAAAAAAAACCAGCTTTGCGATGAGTGCGGAAC----TCCGGTAATGAGTCCCCAGCAGCAGGCCGAGCGG
15	3	B3-B12	AAGCTAACGCGAAAAAAAAACCAGCTTTGCGATGAGTGCGGAAC----TCCGGTAATGAGTCCCCAGCAGCAGGCCGAGCGG
15	4	B4-E3	AAGCTAACGCGAAAAAAAAACCAGCTTTGCGATGAGTGCGGAACCA^CTCATTACCA^CCGGTAATGAGTCCCCAGCAGCAGGCCGAGCGG
15	4	B4-F1	AAGCTAACGCGAAAAAAAAACCAGCTTTGCGATGAGTGCGG--------CCGGTAATGAGTCCCCAGCAGCAGGCCGAGCGG
15	4	B4-F9	AAGCTAACGCGAAAAAAAAACCAGCTTTGCGATGAGTGCGGAACC------GGTAATGAGTCCCCAGCAGCAGGCCGAGCGG
15	4	B4-G5	AAGCTAACGCGAAAAAAAAACCAGCTTTGCGATGAGTGCGGA----------GTAATGAGTCCCCAGCAGCAGGCCGAGCGG
15	4	B4-H4	AAGCTAACGCGAAAAAAAAACCAGCTTTGCGATGAGTGCGGAACC------GGTAATGAGTCCCCAGCAGCAGGCCGAGCGG
